# Supplementary material for: Arabidopsis Clade I TGA Factors Regulate Apoplastic Defences against the Bacterial Pathogen Pseudomonas syringae through Endoplasmic Reticulum-Based Processes
Source: PLoS One. 2013 Sep 27;8(9):e77378. doi: 10.1371/journal.pone.0077378 (PMC3785447; doi:10.1371/journal.pone.0077378)
Supplement: Table S2 — Statistical analyses for disease test data presented in Figure 1 and Figure S1. (XLSX) [file pone.0077378.s008.xlsx]

## Sheet: fig1A
Figure 1A _Pst hrcC-
row data	Individual					AVG
Genotype	Plant #	count	CFU in original sample	cfu/leaf disk	log	cfu/LD	StDEV	StError
Col-0_DAY0	1xdiluted-1	37	181.735	22.7169	1.35635	35.815	22.6865	13.098
	1xdiluted-2	37	181.735	22.7169	1.35635
	1xdiluted-3	101	496.088	62.011	1.79247
tga1-1tga4-1_DAY0	1xdiluted-1	76	373.294	46.6618	1.66896	47.2757	2.81357	1.62441
	1xdiluted-2	73	358.559	44.8199	1.65147
	1xdiluted-3	82	402.765	50.3456	1.70196
npr1-1_DAY0	1xdiluted-1	32	157.176	19.6471	1.2933	35.815	14.1657	8.1786
	1xdiluted-2	68	334	41.75	1.62066
	1xdiluted-3	75	368.382	46.0478	1.66321
tga1-1tga4-1npr1-1_DAY0	1xdiluted-1	121	594.324	74.2904	1.87093	74.6998	34.3842	19.8517
	1xdiluted-2	66	324.176	40.5221	1.60769
	1xdiluted-3	178	874.294	109.287	2.03857
Col-0_DAY4	10xdiluted-1	291	29572.1	1840.86	3.26502	1032.19	560.518	228.831
	10xdiluted-2	196	19918	1239.89	3.09338
	10xdiluted-3	193	19613.1	1220.92	3.08669
	10xdiluted-4	34	3455.16	215.084	2.33261
	10xdiluted-5	98	9958.98	619.947	2.79235
	10xdiluted-6	167	16970.9	1056.44	3.02384
tga1-1tga4-1_DAY4	100xdiluted-1	86	87924.8	5473.32	3.73825	6184	3905.32	1594.34
	100xdiluted-2	79	80768.2	5027.82	3.70138
	100xdiluted-3	213	217767	13556	4.13213
	100xdiluted-4	102	104283	6491.61	3.81235
	100xdiluted-5	71	72589.1	4518.67	3.65501
	100xdiluted-6	32	32716.2	2036.58	3.3089
npr1-1_DAY4	10xdiluted-1	226	22966.6	1429.67	3.15524	1344.27	613.233	250.351
	10xdiluted-2	281	28555.9	1777.6	3.24983
	10xdiluted-3	118	11991.4	746.466	2.87301
	10xdiluted-4	305	30994.8	1929.43	3.28543
	10xdiluted-5	276	28047.8	1745.97	3.24204
	10xdiluted-6	69	7011.94	436.493	2.63998
tga1-1tga4-1npr1-1_DAY4	100xdiluted-1	117	119619	7446.26	3.87194	7552.33	2218.83	905.833
	100xdiluted-2	116	118596	7382.62	3.86821
	100xdiluted-3	146	149268	9291.92	3.96811
	100xdiluted-4	53	54186.2	3373.09	3.52803
	100xdiluted-5	147	150290	9355.56	3.97107
	100xdiluted-6	133	135977	8464.55	3.9276
summary
DAY0	average	stdev	sterror
Col-0	35.815	22.6865	13.098
tga1-1tga4-1	47.2757	2.81357	1.62441
npr1-1	35.815	34.3842	8.1786
tga1-1tga4-1npr1-1	74.6998	14.1657	19.8517
DAY4
Col-0	1032.19	560.518	228.831
tga1-1tga4-1	6184	3905.32	1594.34
npr1-1	1344.27	2218.83	250.351
tga1-1tga4-1npr1-1	7552.33	613.233	905.833
ANOVA test
	Col DAY0	tga1x4 DAY0	npr1-1 DAY0	triple DAY0	Col DAY4	tga1x4 DAY4	npr1-1 DAY4	triple DAY4
	1.35635	1.66896	1.2933	1.87093	3.26502	3.73825	3.15524	3.87194
	1.35635	1.65147	1.62066	1.60769	3.09338	3.70138	3.24983	3.86821
	1.79247	1.70196	1.66321	2.03857	3.08669	4.13213	2.87301	3.96811
					2.33261	3.81235	3.28543	3.52803
					2.79235	3.65501	3.24204	3.97107
					3.02384	3.36815	2.63998	3.9276
	VassarStats Printable Report
	2x4 Factorial ANOVA for Independent Samples
	standard weighted-means analysis
	Data Entered
		Col 1	Col 2	Col 3	Col 4
		Col 1	tga1x4	npr1-1	triple
	Row 1 day0	1.35635	1.66896	1.2933	1.87093
		1.35635	1.65147	1.62066	1.60769
		1.79247	1.70196	1.66321	2.03857
	Row 2 day4	3.26502	3.73825	3.15524	3.87194
		3.09338	3.70138	3.24984	3.86821
		3.08669	4.13213	2.87301	3.9681
		2.33261	3.81235	3.28543	3.52803
		2.79235	3.65501	3.24204	3.97107
		3.02385	3.36815	2.63998	3.9276
	Summary Data		Within each box:
			Item 1 = N Item 2 =
			X Item 3 = Mean
			Item 4 =
			X2 Item 5 = Variance
			Item 6 = Std. Dev. Item 7 = Std. Err.
		C1	C2	C3	C4	Tot.
	R1	3	3	3	3	12
		4.50517	5.02239	4.57716	5.51719	19.6219
		1.5017	1.6741	1.5257	1.8391	1.6352
		6.89231	8.40946	7.06541	10.2408	32.608
		0.06	0	0.04	0.05	0.05
		0.25	0.03	0.2	0.22	0.22
		0.15	0.01	0.12	0.13	0.06
	R2	6	6	6	6	24
		17.5939	22.4073	18.4455	23.135	81.5817
		2.9323	3.7345	3.0743	3.8558	3.3992
		52.139	83.9869	57.0455	89.3433	282.514
		0.11	0.06	0.07	0.03	0.23
		0.33	0.25	0.26	0.17	0.48
		0.14	0.1	0.11	0.07	0.1
	Tot.	9	9	9	9	36
		22.0991	27.4297	23.0227	28.6521	101.204
		2.4555	3.0477	2.5581	3.1836	2.8112
		59.0313	92.3963	64.1109	99.5841	315.123
		0.6	1.1	0.65	1.05	0.87
		0.77	1.05	0.81	1.02	0.94
		0.26	0.35	0.27	0.34	0.16
	ANOVA Summary
	Source	SS	df	MS	F	P
	Rows	24.9	1	24.9	425.12	<.0001
	Columns	3.47	3	1.16	19.75	<.0001
	r x c	0.61	3	0.2	3.47	0.0293
	Error	1.64	28	0.06
	Total	30.62	35
	Critical Values for the Tukey HSD Test
		HSD[.05]	HSD[.01]	HSD=the absolute [unsigned] difference between any two means (row means, column means, or cell means) required for significance at the designated level: HSD[.05] for the .05 level; HSD[.01] for the .01 level. The HSD test between row means can be meaningfully performed only if the row effect is significant; between column means, only if the column effect is significant; and between cell means, on…
	Rows [2]	0.18	0.24
	Columns [4]	0.31	0.39
	Cells [8]	0.56	0.68
post-hoc test
		Col DAY0	tga1x4 DAY0	npr1-1 DAY0	triple DAY0	Col DAY4	tga1x4 DAY4	npr1-1 DAY4	triple DAY4
	Col DAY0	-	-0.1724	-0.024	-0.3374	-1.4306	-2.2328	-1.5726	-2.3541
	tga1x4 DAY0		-	0.1484	-0.165	-1.2582	-2.0604	-1.4002	-2.1817
	npr1-1 DAY0			-	-0.3134	-1.4066	-2.2088	-1.5486	-2.3301
	triple DAY0				-	-1.0932	-1.8954	-1.2352	-2.0167
	Col DAY4					-	-0.8022	-0.142	-0.9235
	tga1x4 DAY4						-	0.6602	-0.1213
	npr1-1 DAY4							-	-0.7815
	triple DAY4								-
	highlighted cell means significance at p<0.05

## Sheet: fig1B
Figure 1B _Psp 1448a
row data	Individual					AVG
Genotype	Plant #	count	CFU in original sample	cfu/leaf disk	log	cfu/LD	StDEV	StError
Col-0_DAY0	6xdiluted-1	74	2270.11	283.764	2.45296	354.066	131.855	76.1264
	6xdiluted-2	71	2178.08	272.26	2.43498
	6xdiluted-3	132	4049.39	506.174	2.7043
tga1-1tga4-1_DAY0	6xdiluted-1	57	1748.6	218.575	2.3396	329.78	176.269	101.769
	6xdiluted-2	139	4264.13	533.017	2.72674
	6xdiluted-3	62	1901.99	237.748	2.37612
npr1-1_DAY0	6xdiluted-1	71	2178.08	272.26	2.43498	282.486	119.204	68.8222
	6xdiluted-2	106	3251.79	406.473	2.60903
	6xdiluted-3	44	1349.8	168.725	2.22718
tga1-1tga4-1npr1-1_DAY0	6xdiluted-1	34	1043.03	130.378	2.1152	185.342	57.69	33.3073
	6xdiluted-2	47	1441.83	180.229	2.25582
	6xdiluted-3	64	1963.34	245.418	2.38991
Col-0_DAY4	30xdiluted-1	51	8140.99	1017.62	3.00759	2361.15	1191.05	486.243
	30xdiluted-2	81	12929.8	1616.23	3.2085
	30xdiluted-3	74	11812.4	1476.55	3.16925
	30xdiluted-4	204	32564	4070.49	3.60965
	30xdiluted-5	167	26657.7	3332.22	3.52273
	30xdiluted-6	133	21230.4	2653.8	3.42387
tga1-1tga4-1_DAY4	30xdiluted-1	320	51080.7	6385.09	3.80517	12830	10408.2	4249.12
	30xdiluted-2	208	33202.5	4150.31	3.61808
	30xdiluted-3	274	43737.9	5467.23	3.73777
	30xdiluted-4	822	131214	16401.7	4.21489
	30xdiluted-5	643	102640	12830	4.10823
	30xdiluted-6	1591	253967	31745.9	4.50169
npr1-1_DAY4	30xdiluted-1	62	60492.2	7561.53	3.87861	4561.31	1880.72	841.083
	30xdiluted-2	23	22440.7	2805.08	3.44795
	30xdiluted-3	36	35124.5	4390.56	3.64252
	30xdiluted-4	26	25367.7	3170.96	3.50119
	30xdiluted-5	40	39027.2	4878.4	3.68828
tga1-1tga4-1npr1-1_DAY4	30xdiluted-1	266	42460.8	5307.61	3.7249	10286	4334.42	1769.52
	30xdiluted-2	740	118124	14765.5	4.16925
	30xdiluted-3	469	74865.2	9358.15	3.97119
	30xdiluted-4	343	54752.1	6844.02	3.83531
	30xdiluted-5	813	129777	16222.1	4.21011
	30xdiluted-6	462	73747.8	9218.47	3.96466
summary
DAY0	average	stdev	sterror
Col-0	354.066	131.855	76.1264
tga1-1tga4-1	329.78	176.269	101.769
npr1-1	282.486	57.69	68.8222
tga1-1tga4-1npr1-1	185.342	119.204	33.3073
DAY4
Col-0	2361.15	1191.05	486.243
tga1-1tga4-1	12830	10408.2	4249.12
npr1-1	4561.31	4334.42	841.083
tga1-1tga4-1npr1-1	10286	1880.72	1769.52
ANOVA test
	Col DAY0	tga1x4 DAY0	npr1-1 DAY0	triple DAY0	Col DAY4	tga1x4 DAY4	npr1-1 DAY4	triple DAY4
	2.45296	2.3396	2.43498	2.1152	3.00759	3.80517	3.87861	3.7249
	2.43498	2.72674	2.60903	2.25582	3.2085	3.61808	3.44795	4.16925
	2.7043	2.37612	2.22718	2.38991	3.16925	3.73777	3.64252	3.97119
					3.60965	4.21489	3.50119	3.83531
					3.52273	4.10823	3.68828	4.21011
					3.42387	4.50169		3.96466
	VassarStats Printable Report
	2x4 Factorial ANOVA for Independent Samples
	standard weighted-means analysis
	Data Entered
		Col 1	Col 2	Col 3	Col 4
		wt	tga1x4	npr1-1	triple
	Row 1 day0	2.45296	2.3396	2.43498	2.11521
		2.43498	2.72674	2.60903	2.25582
		2.7043	2.37612	2.22718	2.38991
	Row 2 day4	3.00759	3.80517	3.87861	3.7249
		3.2085	3.61808	3.44795	4.16925
		3.16925	3.73777	3.64252	3.97119
		3.60965	4.21489	3.50119	3.83531
		3.52273	4.10823	3.68828	4.21011
		3.42387	4.50169		3.96466
	Summary Data		Within each box:
			Item 1 = N Item 2 =
			X Item 3 = Mean
			Item 4 =
			X2 Item 5 = Variance
			Item 6 = Std. Dev. Item 7 = Std. Err.
		C1	C2	C3	C4	Tot.
	R1	3	3	3	3	12
		7.59224	7.44246	7.27119	6.76093	29.0668
		2.5307	2.4808	2.4237	2.2536	2.4222
		19.2594	18.5548	17.6965	15.2745	70.7852
		0.02	0.05	0.04	0.02	0.03
		0.15	0.21	0.19	0.14	0.19
		0.09	0.12	0.11	0.08	0.05
	R2	6	6	5	6	23
		19.9416	23.9858	18.1585	23.8754	85.9614
		3.3236	3.9976	3.6317	3.9792	3.7375
		66.5463	96.4487	66.0616	95.181	324.238
		0.05	0.11	0.03	0.04	0.13
		0.23	0.34	0.17	0.19	0.37
		0.09	0.14	0.08	0.08	0.08
	Tot.	9	9	8	9	35
		27.5338	31.4283	25.4297	30.6364	115.028
		3.0593	3.492	3.1787	3.404	3.2865
		85.8057	115.004	83.7581	110.456	395.023
		0.2	0.66	0.42	0.77	0.5
		0.44	0.81	0.65	0.88	0.71
		0.15	0.27	0.23	0.29	0.12
	ANOVA Summary
	Source	SS	df	MS	F	P
	Rows	13.64	1	13.64	268.82	<.0001
	Columns	1.06	3	0.35	6.96	0.0013
	r x c	0.91	3	0.3	5.98	0.0029
	Error	1.37	27	0.05
	Total	16.98	34
post-hoc test
	Critical Values for the Tukey HSD Test
		HSD[.05]	HSD[.01]	HSD=the absolute [unsigned] difference between any two means (row means, column means, or cell means) required for significance at the designated level: HSD[.05] for the .05 level; HSD[.01] for the .01 level. The HSD test between row means can be meaningfully performed only if the row effect is significant; between column means, only if the column effect is significant; and between cell means, on…
	Rows [2]	0.16	0.22
	Columns [4]	0.3	0.37
	Cells [8]	0.53	0.64
		Col DAY0	tga1x4 DAY0	npr1-1 DAY0	triple DAY0	Col DAY4	tga1x4 DAY4	npr1-1 DAY4	triple DAY4
	Col DAY0	-	0.0499	0.107	0.2771	-0.7929	-1.4669	-1.101	-1.4485
	tga1x4 DAY0		-	0.0571	0.2272	-0.8428	-1.5168	-1.1509	-1.4984
	npr1-1 DAY0			-	0.1701	-0.8999	-1.5739	-1.208	-1.5555
	triple DAY0				-	-1.07	-1.744	-1.3781	-1.7256
	Col DAY4					-	-0.674	-0.3081	-0.6556
	tga1x4 DAY4						-	0.3659	0.0184
	npr1-1 DAY4							-	-0.3475
	triple DAY4								-
	highlighted cell means significance at p<0.05

## Sheet: figS1A
Figure S1A _Pst hrcC-
row data	Individual					AVG
Genotype	Plant #	count	CFU in original sample	cfu/leaf disk	log	cfu/LD	StDEV	StError
Col-0_DAY4	50xdiluted-1	205	52442.9	6555.36	3.8166	10822	4920.7	1859.85
	50xdiluted-2	169	43233.4	5404.17	3.73273
	50xdiluted-3	444	113584	14197.9	4.15223
	50xdiluted-4	429	109746	13718.3	4.1373
	50xdiluted-5	584	149398	18674.8	4.27126
	50xdiluted-6	213	54489.4	6811.18	3.83322
	50xdiluted-7	325	83141.1	10392.6	4.01673
tga1-1_DAY4	500xdiluted-1	103	258703	32337.8	4.50971	15949.1	10647.8	4761.84
	500xdiluted-2	55	138142	17267.8	4.23724
	500xdiluted-3	37	92932	11616.5	4.06508
	500xdiluted-4	49	123072	15384	4.18707
	500xdiluted-5	10	25116.8	3139.59	3.49687
tga1-4_DAY4	500xdiluted-1	141	354146	44268.3	4.64609	25655	20345.9	7690.01
	500xdiluted-2	31	77861.9	9732.74	3.98824
	500xdiluted-3	102	256191	32023.9	4.50547
	500xdiluted-4	21	52745.2	6593.15	3.81909
	500xdiluted-5	37	92932	11616.5	4.06508
	500xdiluted-6	49	123072	15384	4.18707
	500xdiluted-7	191	479730	59966.3	4.77791
tga1-1tga4-1_DAY4	50xdiluted-1	364	93118	11639.8	4.06594	48381.7	37806.5	16907.6
	50xdiluted-2	1297	331797	41474.6	4.61778
	50xdiluted-3	460	117677	14709.6	4.1676
	50xdiluted-4	2412	617035	77129.4	4.88722
	50xdiluted-5	3032	775643	96955.3	4.98657
summary
DAY4	average	stdev	sterror
Col-0	10822	4920.7	1859.85
tga1-1	15949.1	10647.8	4761.84
tga4-1	25655	20345.9	7690.01
tga1-1tga4-1	48381.7	37806.5	16907.6
ANOVA test
	Col	tga1-1	tga4-1	tga1x4
	3.8166	4.50971	4.64609	4.06594
	3.73273	4.23724	3.98824	4.61778
	4.15223	4.06508	4.50547	4.1676
	4.1373	4.18707	3.81909	4.88722
	4.27126	3.49687	5.04342	4.98657
	3.83322		4.06508
	4.01673		4.18707
			4.77791
	Anova: Single Factor
	SUMMARY
	Groups	Count	Sum	Average	Variance
	Col-0	7	27.9601	3.99429	0.0414234
	tga1-1	5	20.496	4.09919	0.139814
	tga4-1	8	35.0324	4.37905	0.184213
	tga1-1tga4-1	5	22.7251	4.54502	0.172331
	ANOVA	sum of squares		mean square
	Source of Variation	SS	df	MS	F	P-value	F crit
	Between Groups	1.13978	3	0.379926	2.86314	0.0611573	3.07247
	Within Groups	2.78661	21	0.132696
	Total	3.92639	24
post-hoc test
	Least significant difference(Tukey's Honest Significant Difference):
	for p<0.05 =0.5216
	for p<0.01 =0.6761
		Col-0	tga1-1	tga4-1	tga1-1tga4-1
	Col-0	-	-0.1049	-0.384752	-0.55073
	tga1-1		-	-0.279852	-0.445831
	tga4-1			-	-0.165978
	tga1-1tga4-1				-
	highlighted cell means significance at p<0.05

## Sheet: figS1B
Figure S1B _Psp 1448a
row data	Individual					AVG
Genotype	Plant #	count	CFU in original sample	cfu/leaf disk	log	cfu/LD	StDEV	StError
Col-0_DAY4	100xdiluted-1	132	69284.9	8660.61	3.93755	7651.85	2161.3	764.134
	100xdiluted-2	131	68760	8595	3.93425
	100xdiluted-3	89	46714.8	5839.35	3.76636
	100xdiluted-4	95	49864.1	6233.01	3.7947
	100xdiluted-5	67	35167.3	4395.92	3.64305
	100xdiluted-6	113	59312.1	7414.01	3.87005
	100xdiluted-7	173	90805.2	11350.6	4.05502
	100xdiluted-8	133	69809.8	8726.22	3.94083
tga1-1_DAY4	100xdiluted-1	155	81357.2	10169.7	4.00731	6429.85	3544.6	1772.3
	100xdiluted-2	127	66660.5	8332.56	3.92078
	100xdiluted-3	77	40416.2	5052.02	3.70347
	100xdiluted-4	33	17321.2	2165.15	3.33549
tga1-4_DAY4	100xdiluted-1	120	62986.3	7873.28	3.89616	5937.77	2396.06	1198.03
	100xdiluted-2	85	44615.3	5576.91	3.74639
	100xdiluted-3	116	60886.7	7610.84	3.88143
	100xdiluted-4	41	21520.3	2690.04	3.42976
tga1-1tga4-1_DAY4	100xdiluted-1	176	92379.8	11547.5	4.06249	16665.1	8600.17	3250.56
	100xdiluted-2	385	202081	25260.1	4.40244
	100xdiluted-3	406	213103	26637.9	4.4255
	100xdiluted-4	246	129122	16140.2	4.20791
	100xdiluted-5	152	79782.6	9972.82	3.99882
	100xdiluted-6	62	32542.9	4067.86	3.60937
	100xdiluted-7	351	184235	23029.3	4.36228
summary
DAY4	average	stdev	sterror
Col-0	7651.85	2161.3	764.134
tga1-1	6429.85	3544.6	1772.3
tga4-1	5937.77	2396.06	1198.03
tga1-1tga4-1	16665.1	8600.17	3250.56
ANOVA test
	Col-0	tga1-1	tga4-1	tga1-1tga4-1
	3.93755	4.00731	3.89616	4.06249
	3.93425	3.92078	3.74639	4.40244
	3.76636	3.70347	3.88143	4.4255
	3.7947	3.33549	3.42976	4.20791
	3.64305			3.99882
	3.87005			3.60937
	4.05502			4.36228
	3.94083
	Anova: Single Factor
	SUMMARY
	Groups	Count	Sum	Average	Variance
	Col-0	8	30.9418	3.86773	0.016545
	tga1-1	4	14.967	3.74176	0.0896951
	tga4-1	4	14.9537	3.73844	0.0468896
	tga1-1tga4-1	8	33.8352	4.2294	0.120045
	ANOVA	sum of squares		mean square
	Source of Variation	SS	df	MS	F	P-value	F crit
	Between Groups	0.657528	3	0.219176	4.01824	0.0226464	3.12735
	Within Groups	1.03636	19	0.0545452
	Total	1.69389	22
post-hoc test
	Least significant difference(Tukey's Honest Significant Difference):
	for p<0.05 =0.3516
	for p<0.01 =0.4578
		Col-0	tga1-1	tga4-1	tga1-1tga4-1
	Col-0	-	0.125966	0.129291	-0.36167
	tga1-1		-	0.00332452	-0.487636
	tga4-1			-	-0.49096
	tga1-1tga4-1				-
	highlighted cell means significance at p<0.05
